# Supplementary figures and images for: Micellar catalysis: a green solution to enable undirected and mild C–H activation of (oligo)thiophenes at the challenging β-position
Source: Royal Society of Chemistry journal article supplement (doi:10.1039/d3sc03708h), 2023-01-01

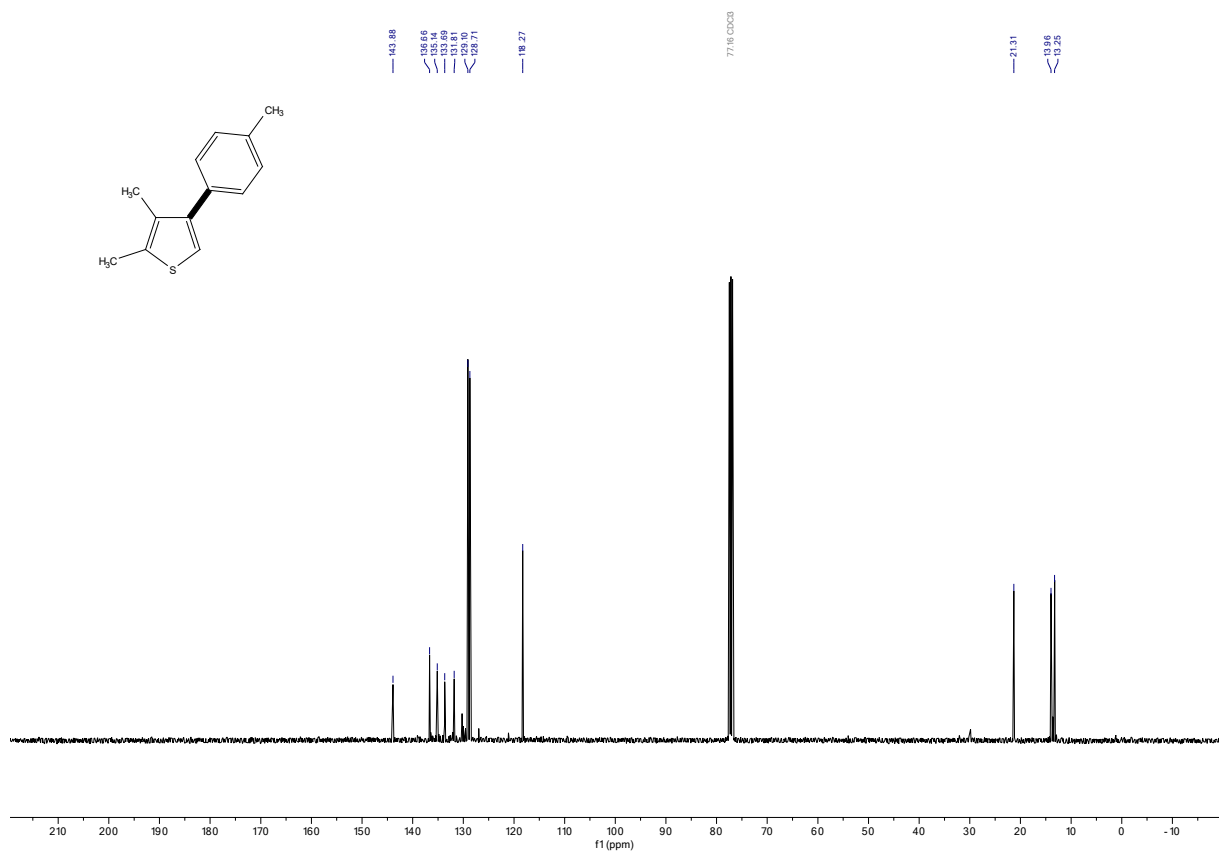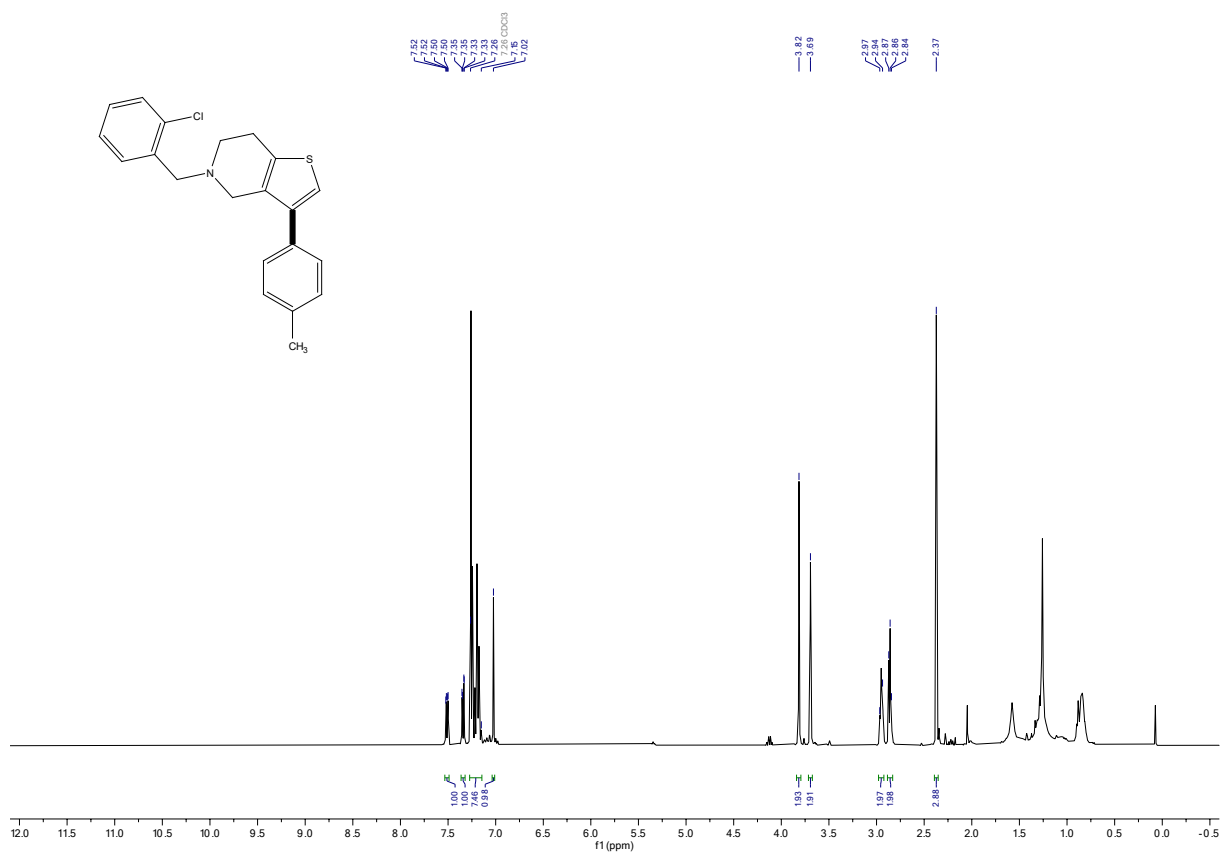

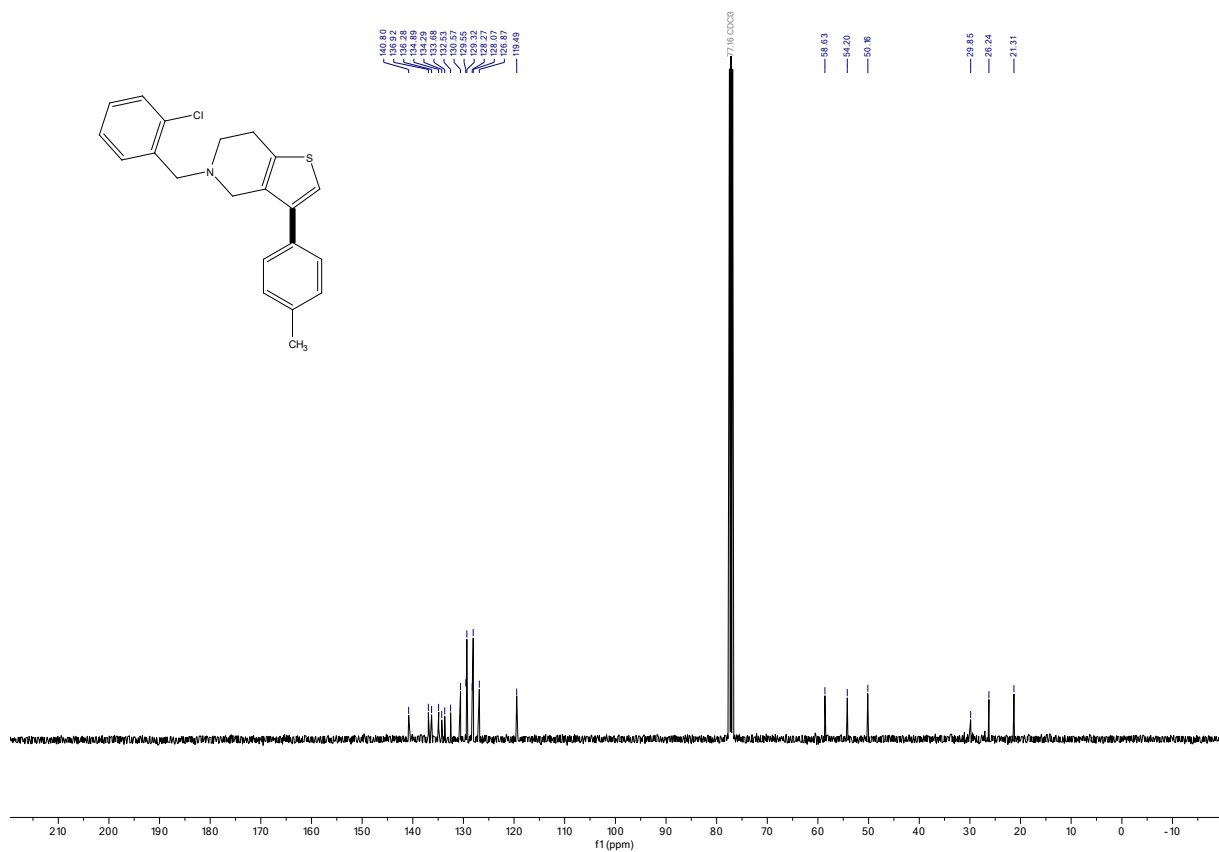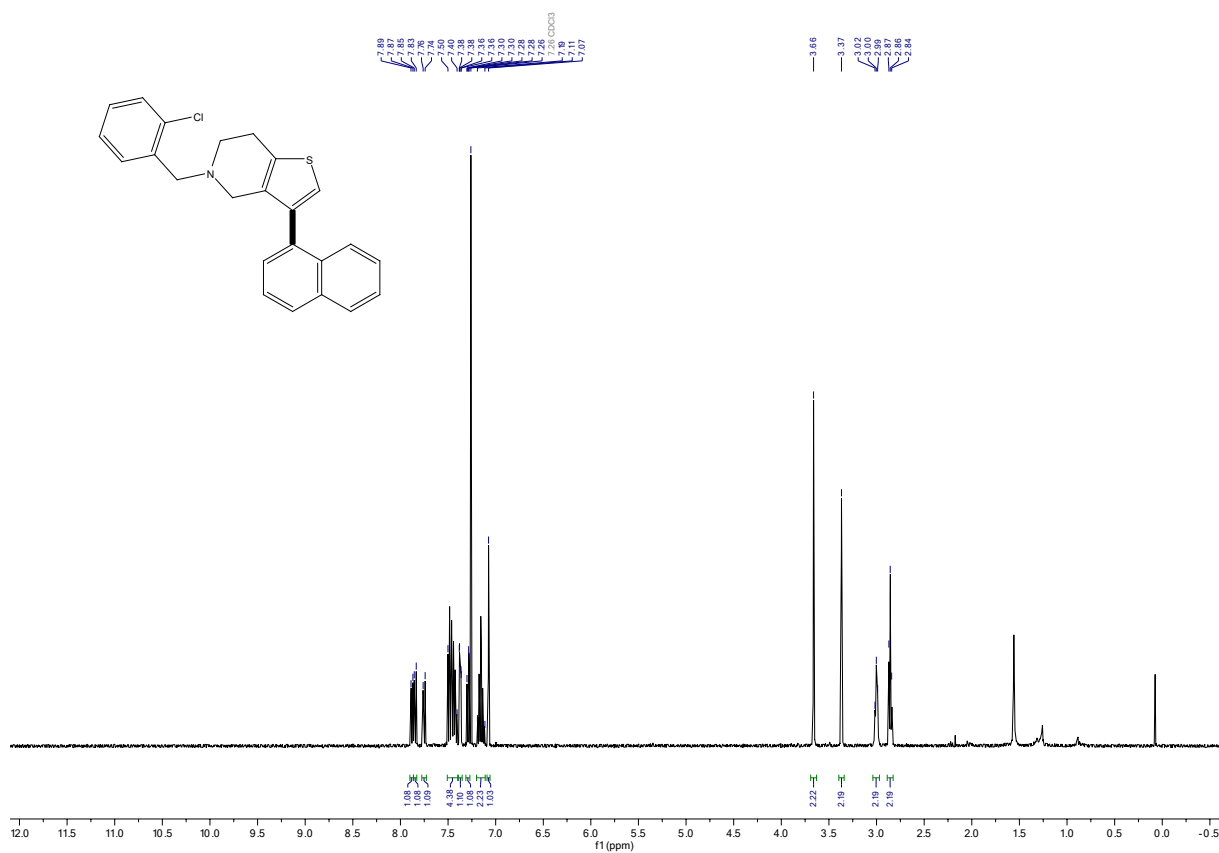

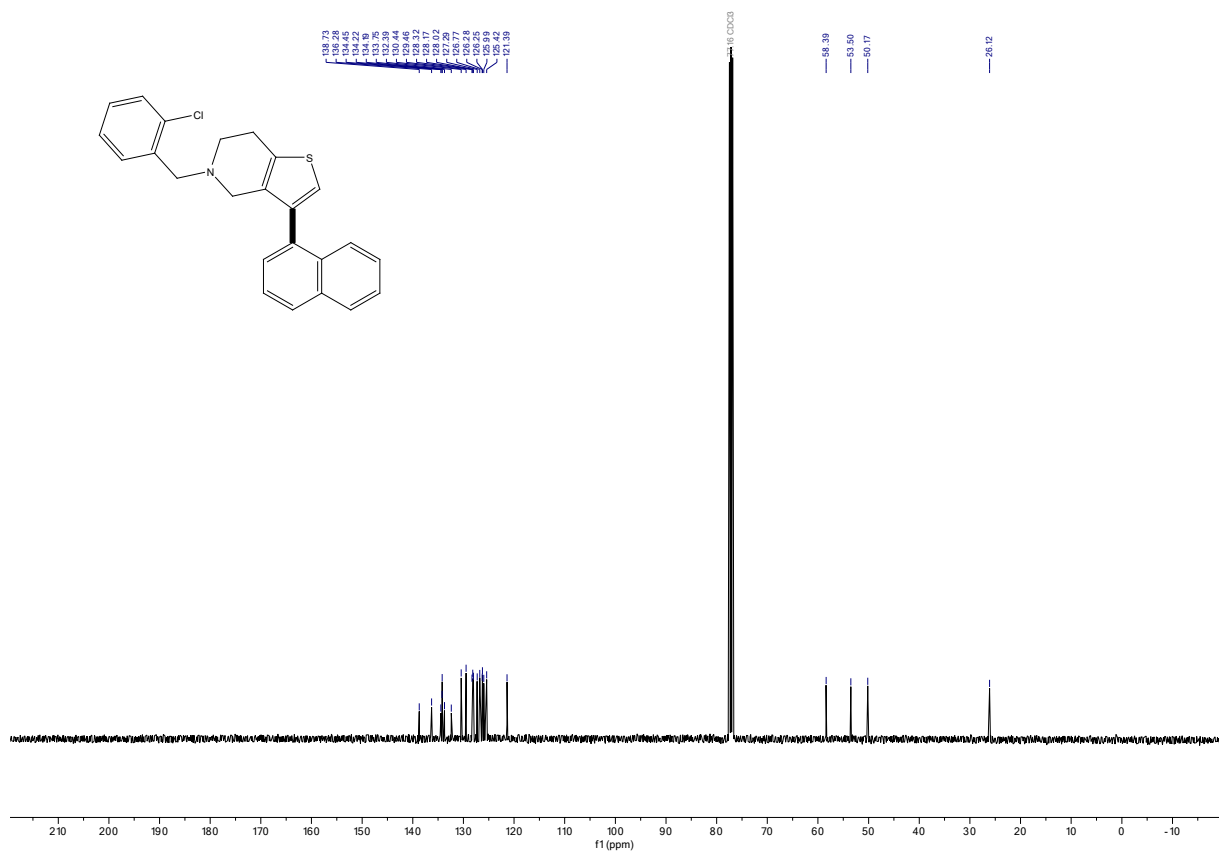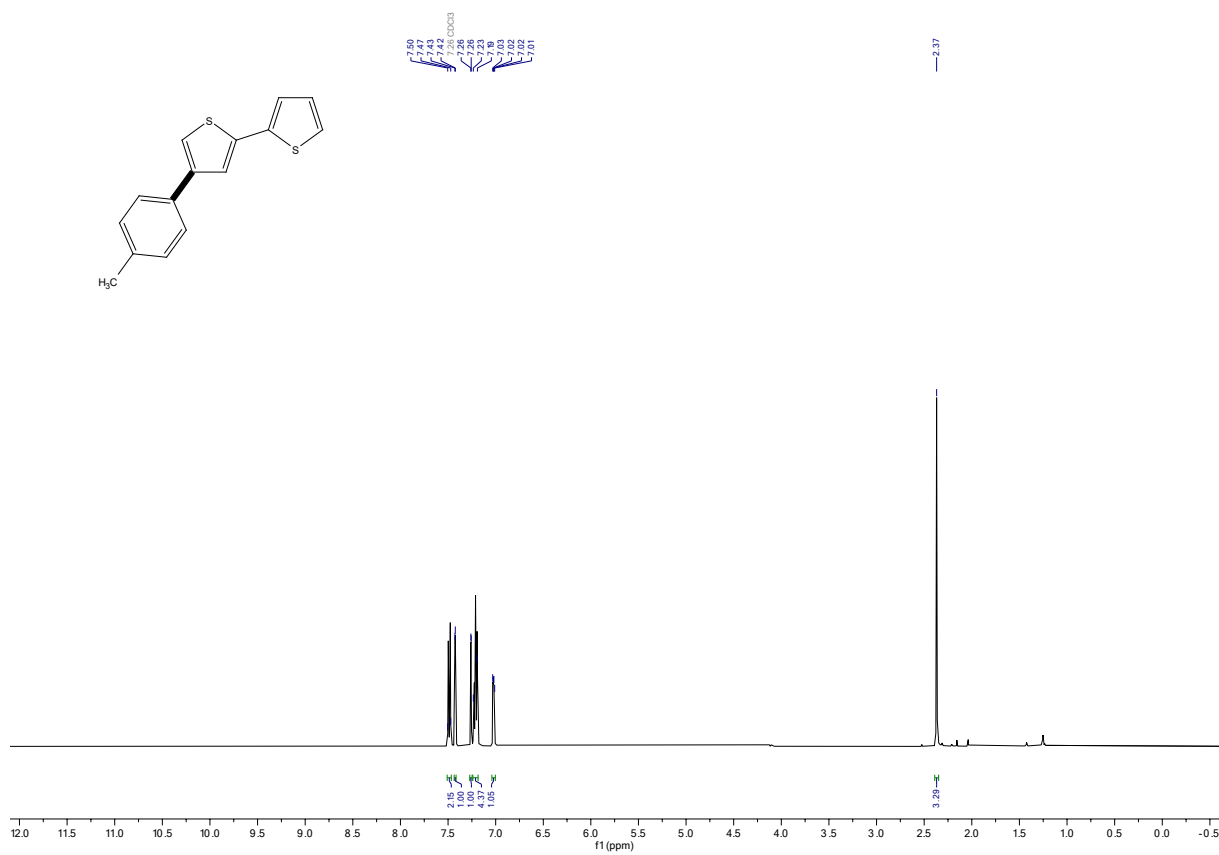

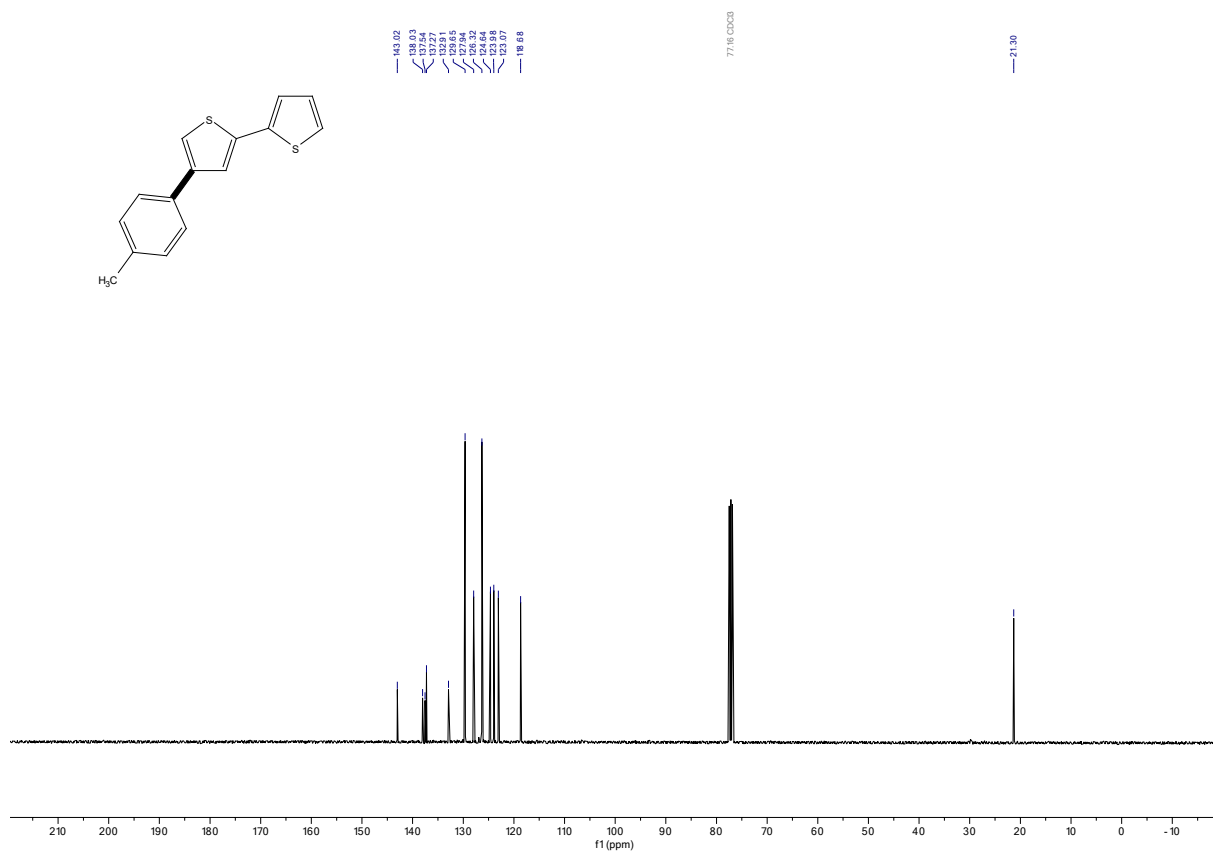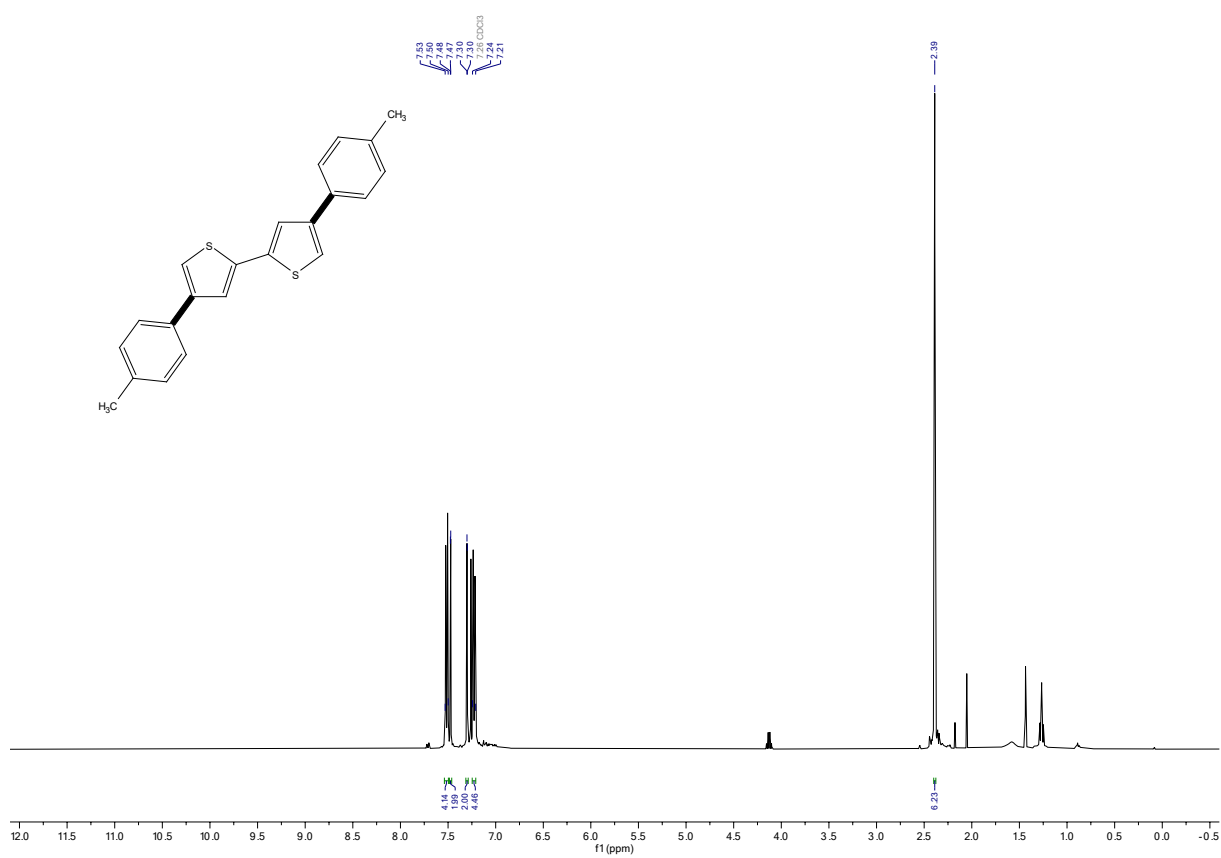

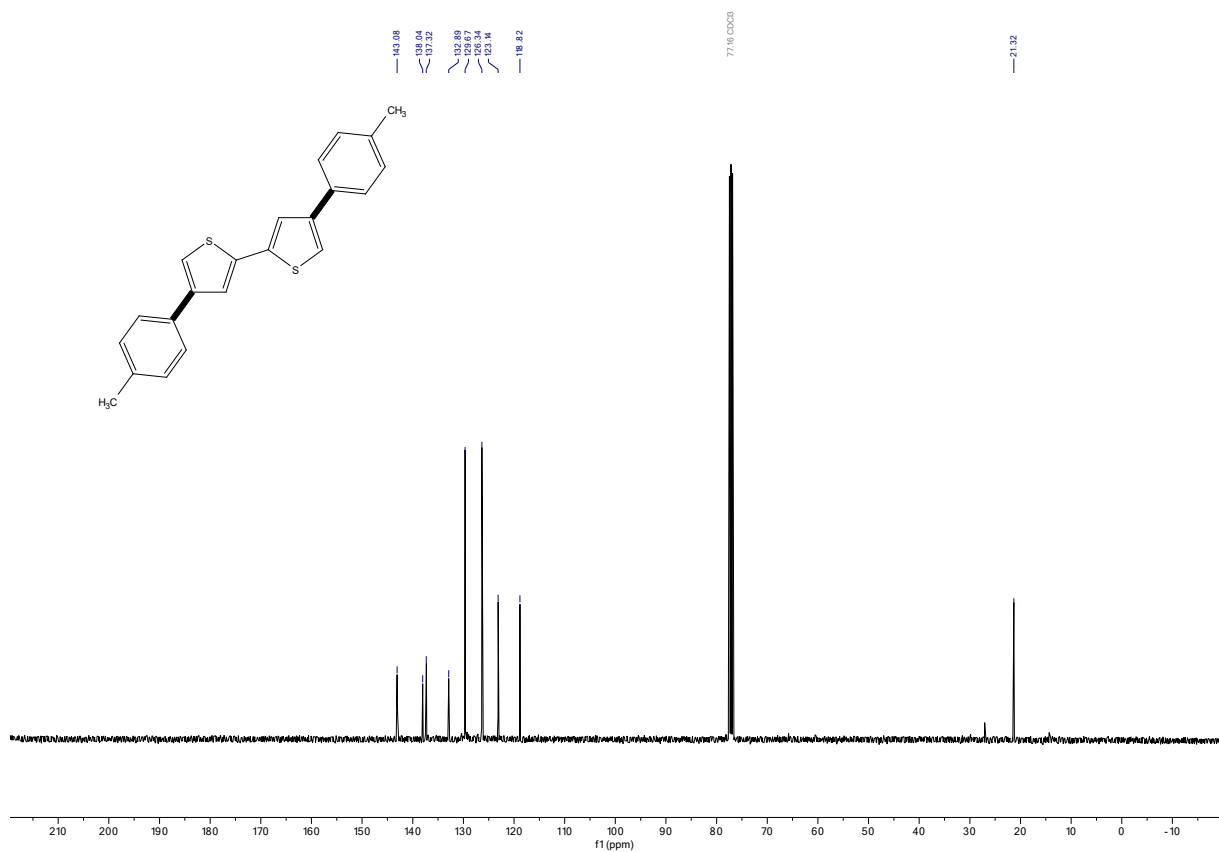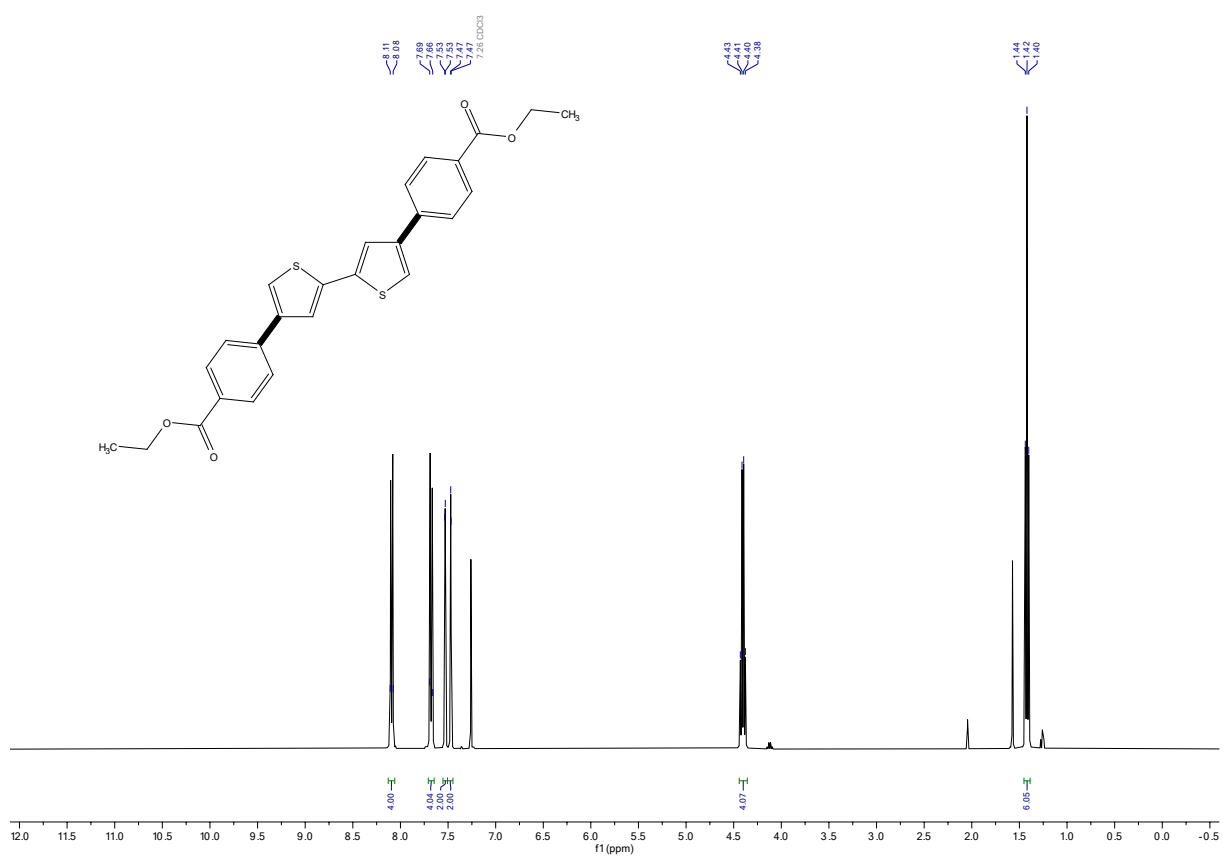

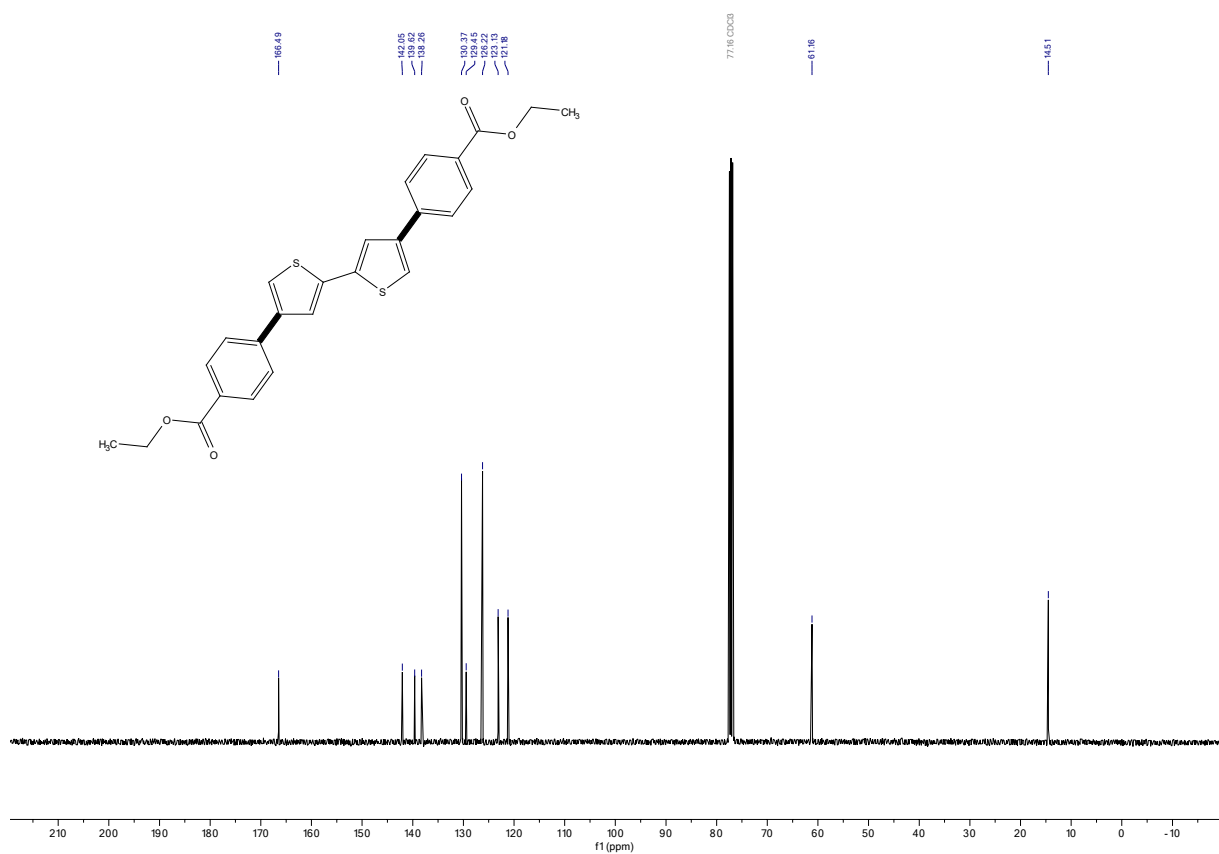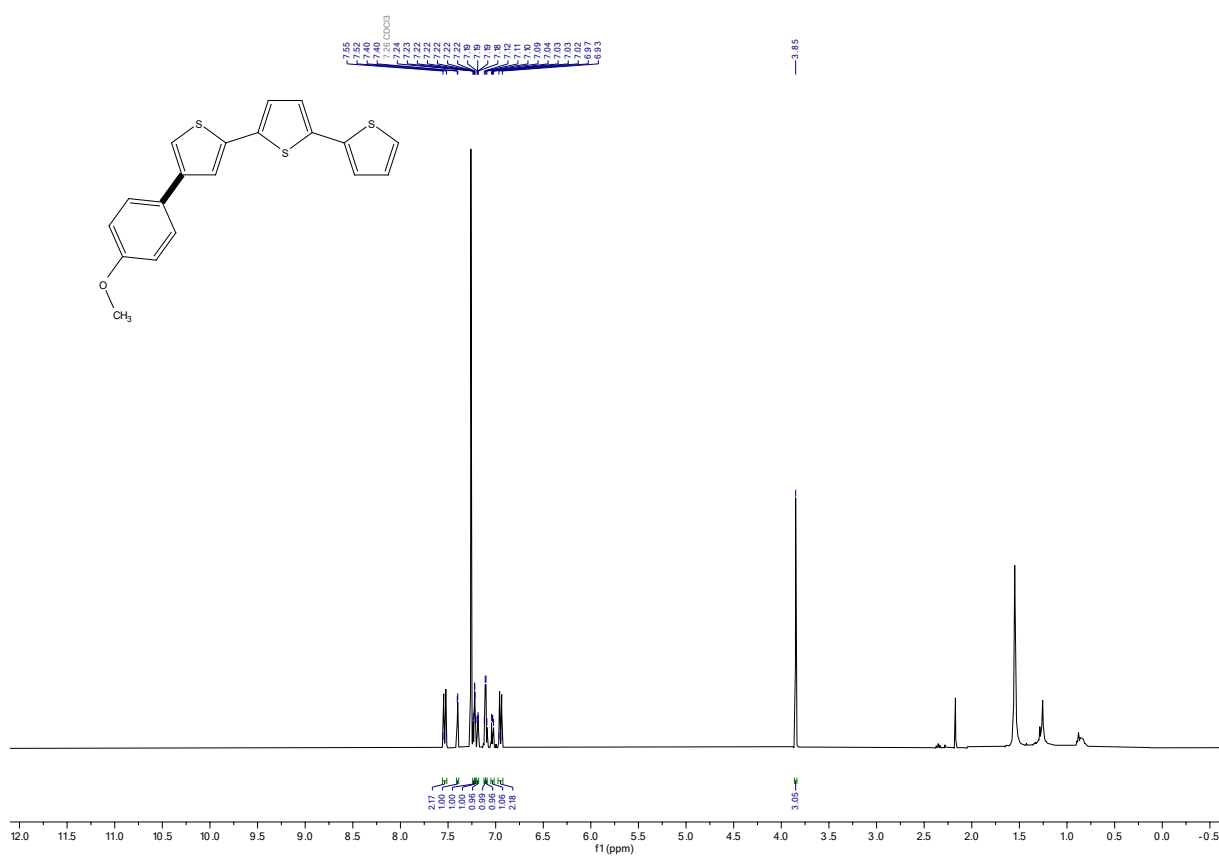

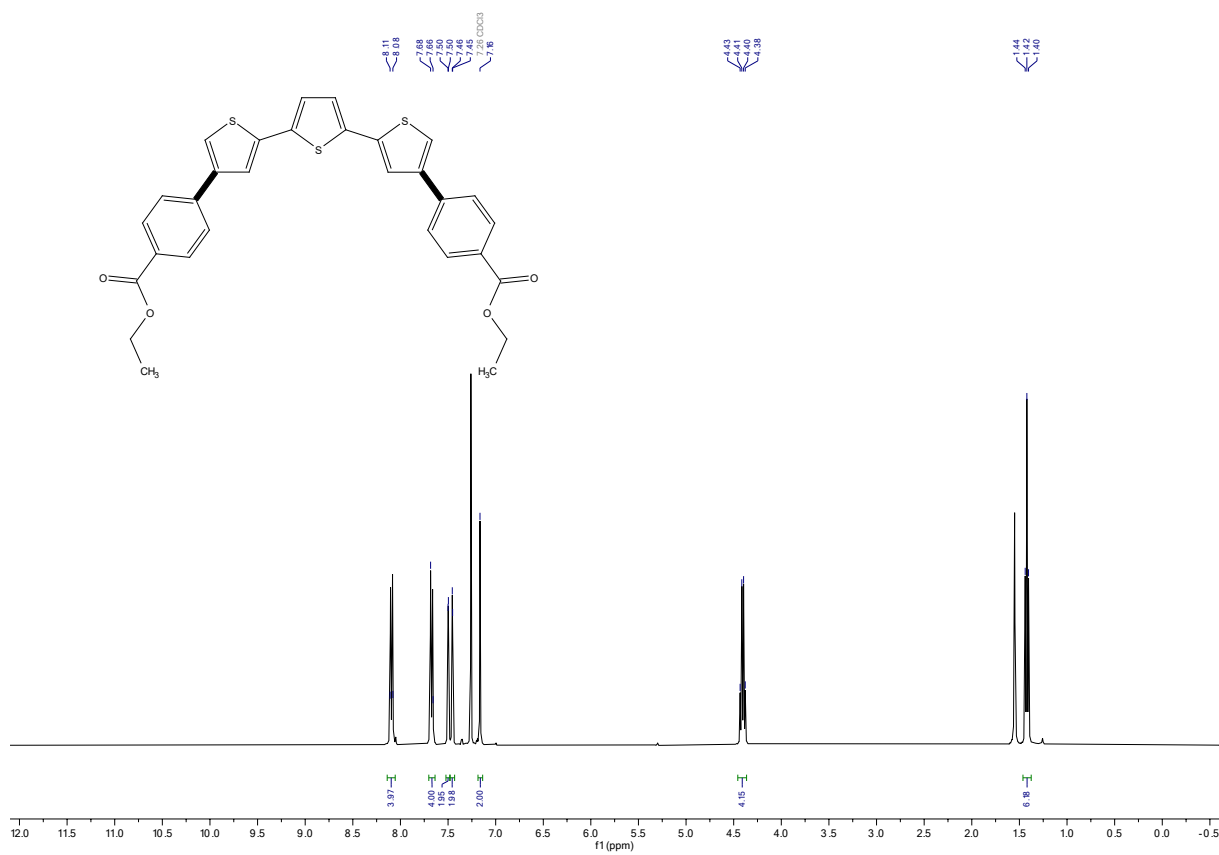

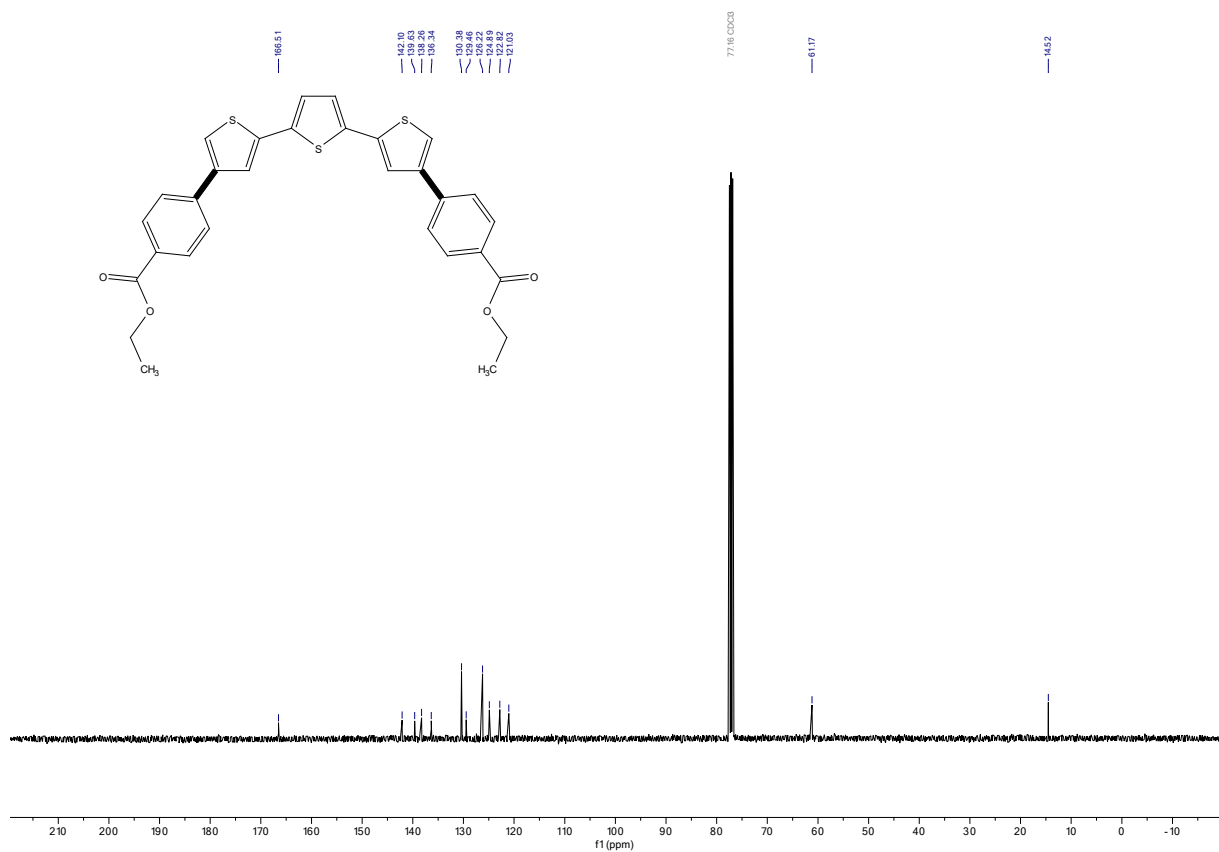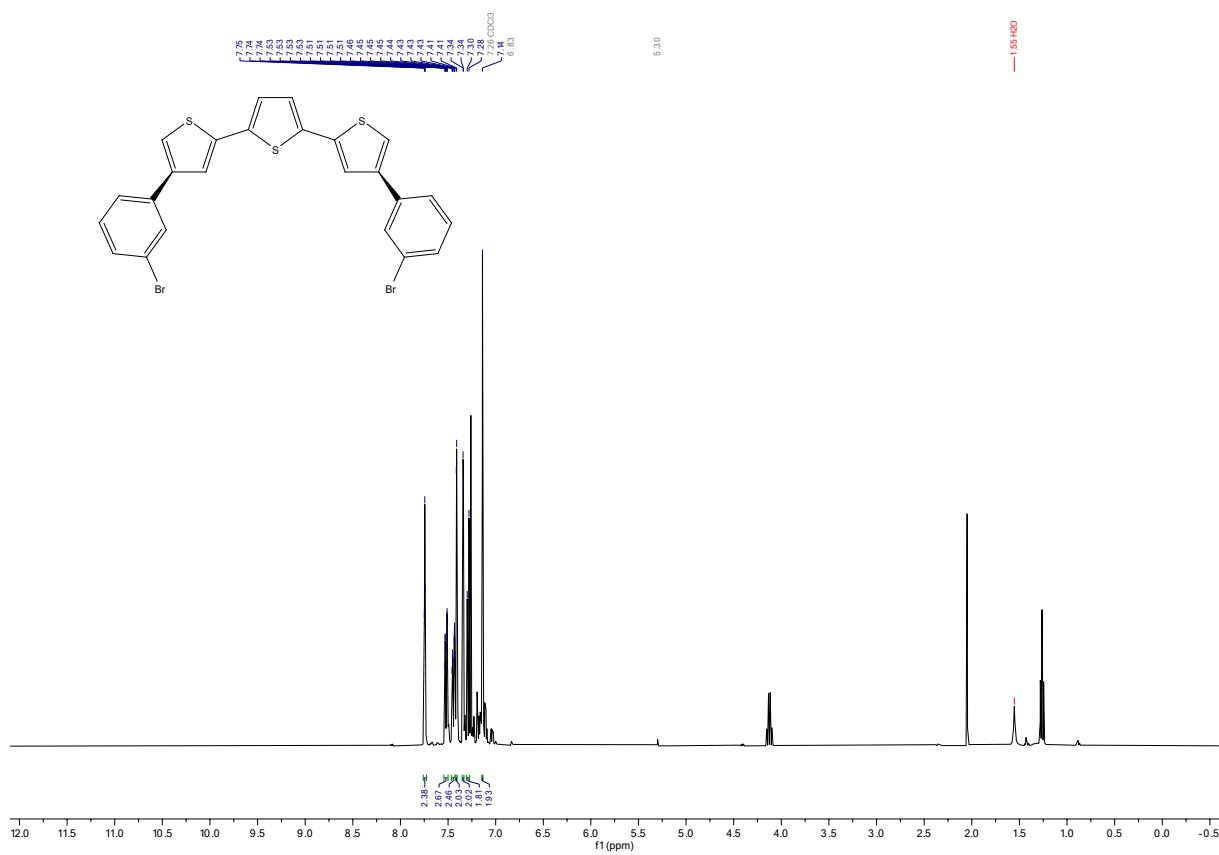

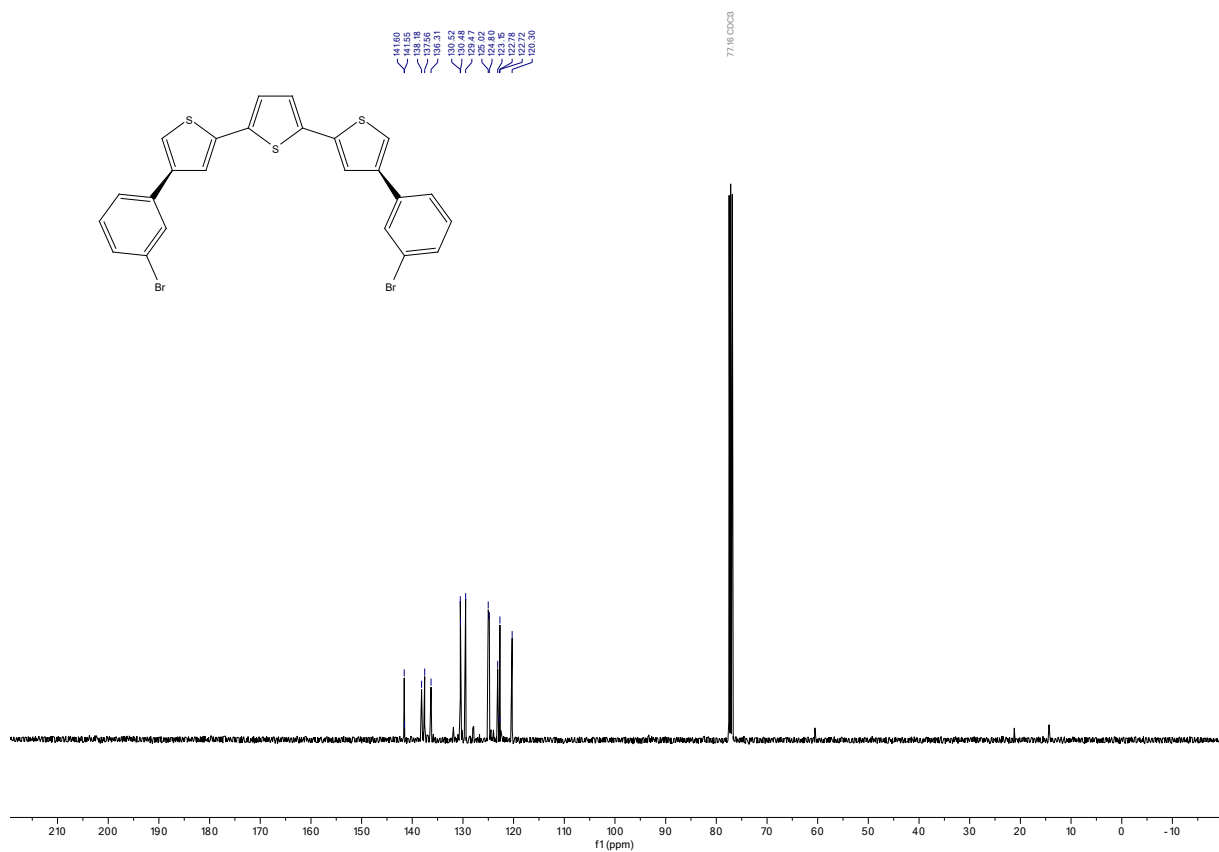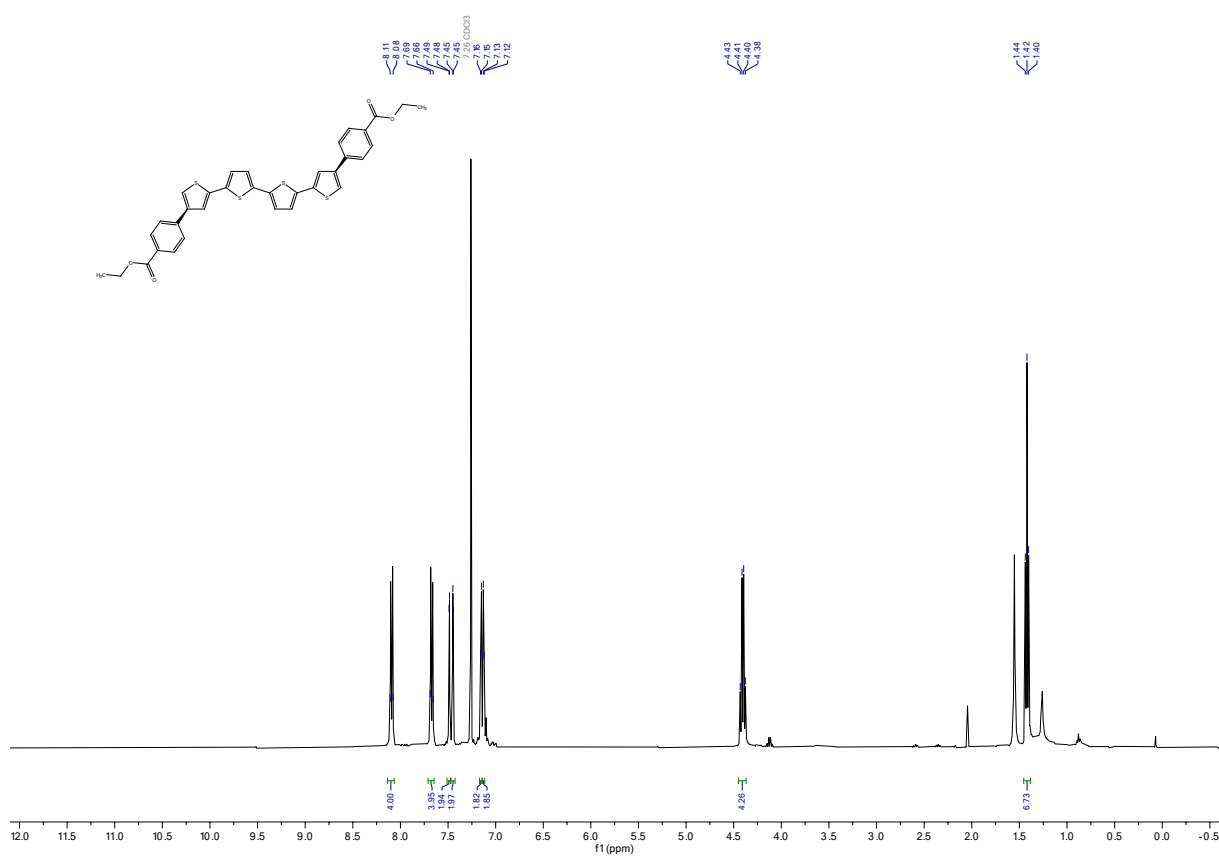

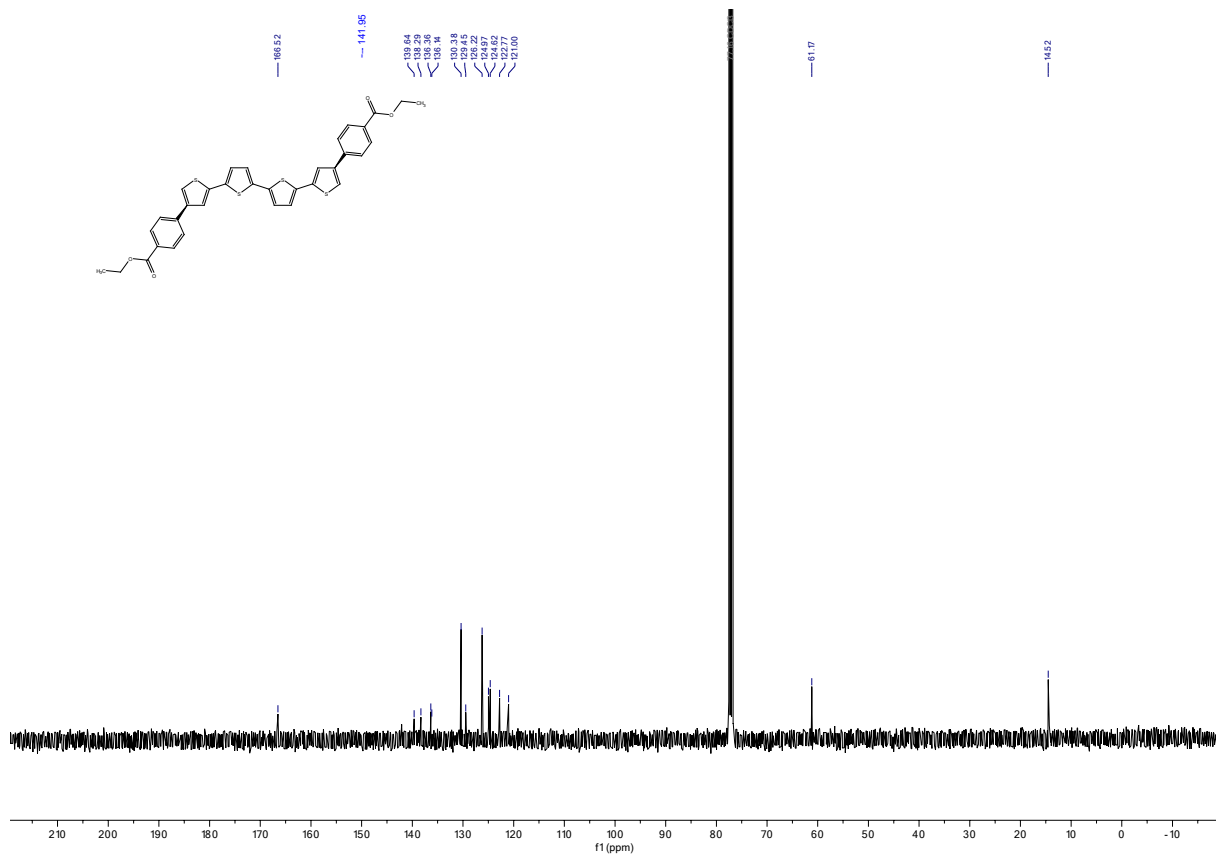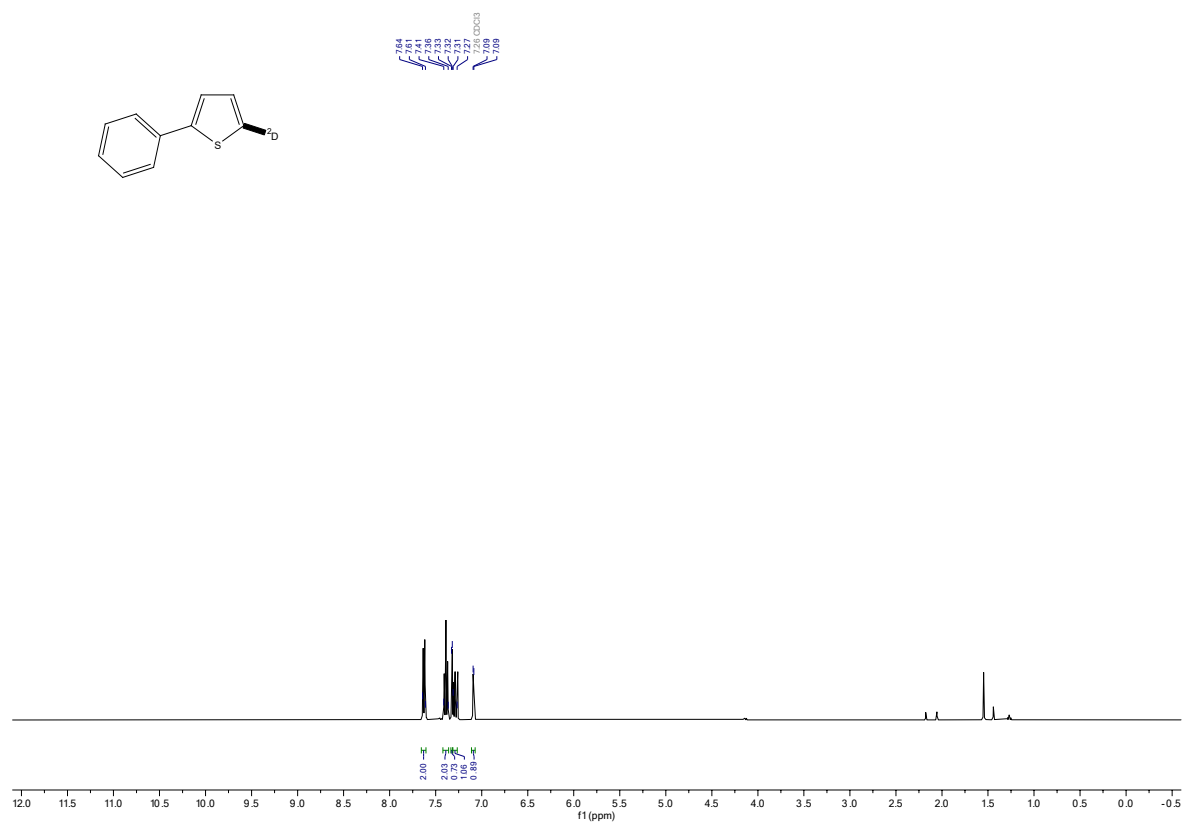

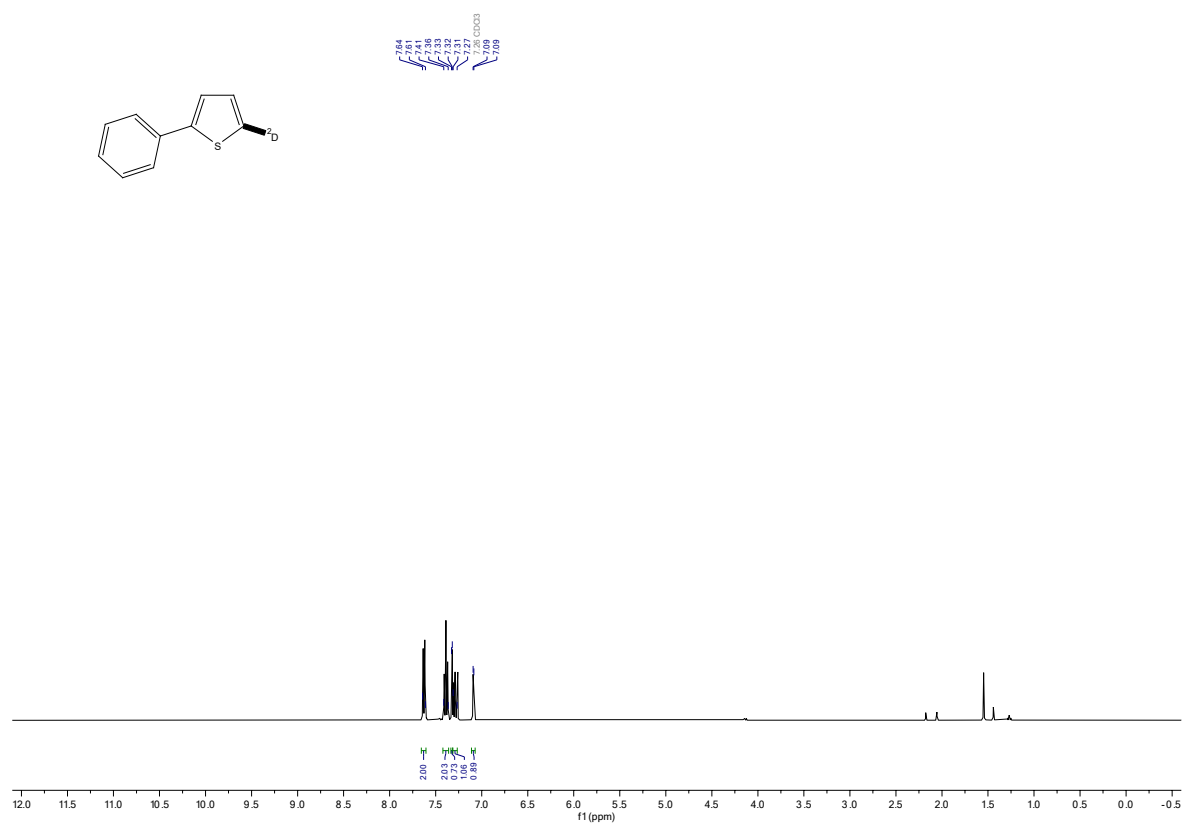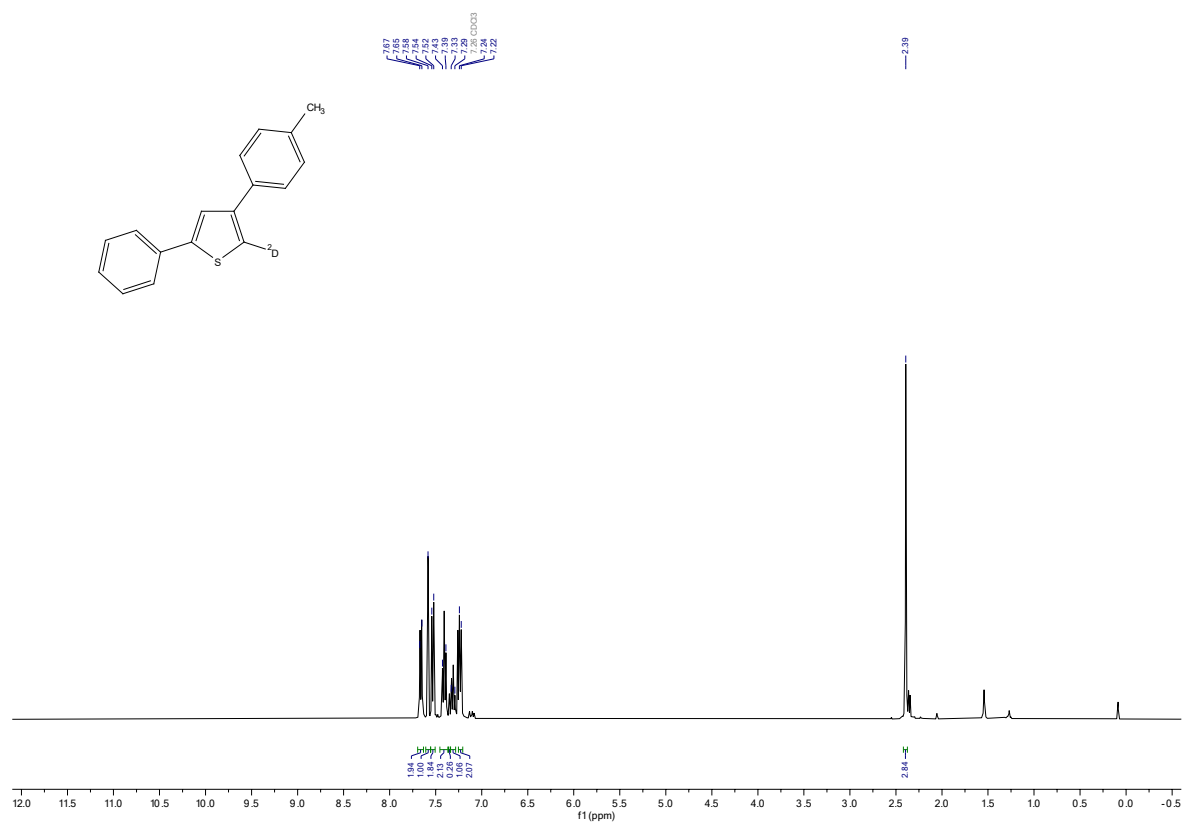

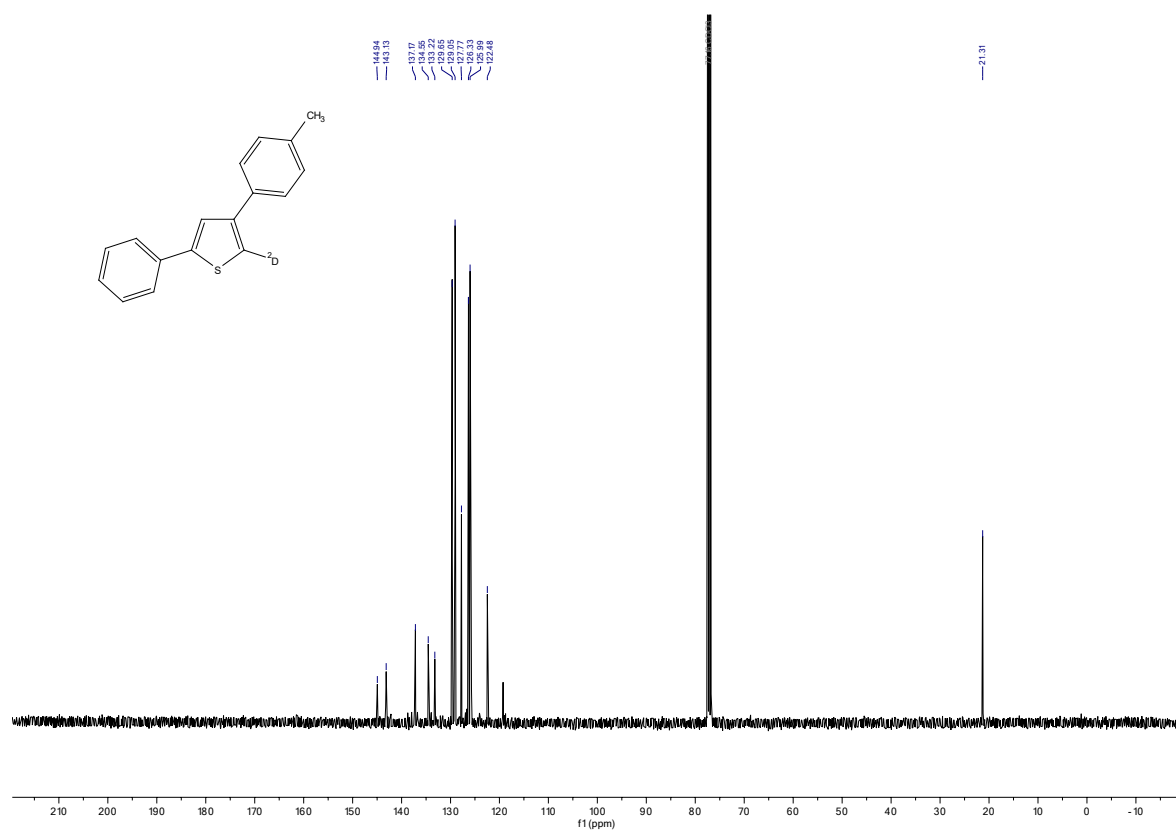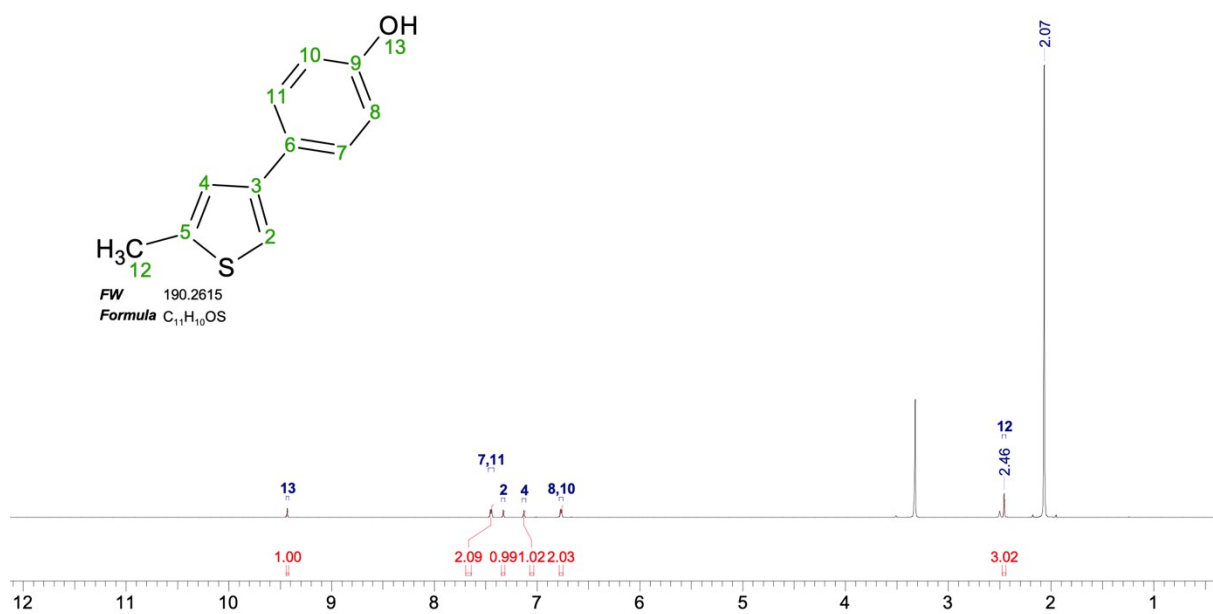

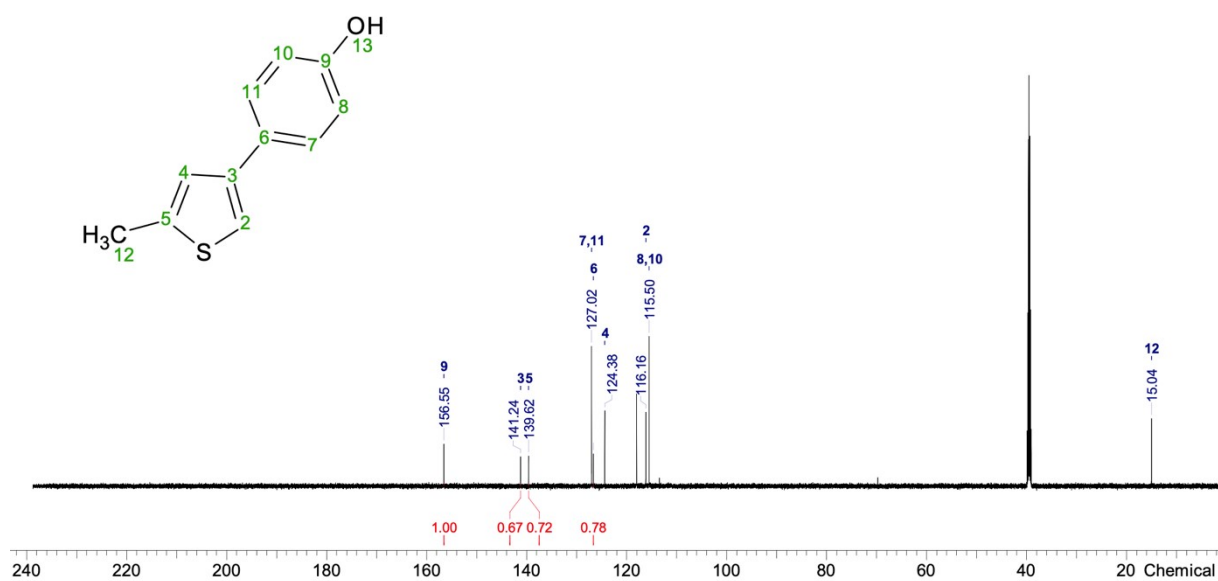

Supplement: d3sc03708h1.pdf [file d3sc03708h1.pdf]
